# Supplementary material
Source: PubMed Central journal article supplement (PMC4603532)
Supplement: NIHMS720805-supplement-01.pdf [file NIHMS720805-supplement-01.pdf]

**Supplemental table 1: qPCR Primers**

| Target                        | Source | Assay Type | Product Id/Reference | Forward                 | Reverse                 |
|-------------------------------|--------|------------|----------------------|-------------------------|-------------------------|
| <i>18S</i>                    | IDT    | SYBR       |                      | AGGAATTCCCAGTAAGTGCG    | GCCTCACTAAACCATCCAA     |
| <i>ACTB</i>                   | Qiagen | SYBR       | QT00095431           |                         |                         |
| <i>IGFBP1</i>                 | Qiagen | SYBR       | QT00049427           |                         |                         |
| <i>PRL</i>                    | IDT    | SYBR       | Francis, MHR, 2006   |                         |                         |
| <i>DNMT1</i>                  | IDT    | SYBR       |                      | TACCTGGACGACCCTGACCTC   | CGTTGGCATCAAAGATGGACA   |
| <i>DNMT3A</i>                 | IDT    | SYBR       |                      | TATTGATGAGCGCACAAGAGAGC | GGGTGTTCCAGGGTAACATTGAG |
| <i>DNMT3B</i>                 | IDT    | SYBR       |                      | GGCAAGTTCTCCGAGGTCTCTG  | TGGTACATGGCTTTTCGATAGGA |
| <i>ESR1 promoter A (ChIP)</i> | IDT    | SYBR       |                      | CCCCAGGGTCATCCTATGTA    | CCGGCTTTCTCTAATGTGCT    |
| <i>ESR1 promoter B (ChIP)</i> | IDT    | SYBR       |                      | GACAGAGCTGGGTCATGTCA    | GGCCTCCTAAGGACCACTC     |
| <i>ESR1 promoter C (ChIP)</i> | IDT    | SYBR       |                      | GAACAGGTAAGCCAAACATTGA  | GGGAGATGTGGGTGATTTCT    |
| <i>SF-1 promoter (ChIP)</i>   | IDT    | SYBR       |                      | AGAGCGCTGCTTCCGCTTCG    | TGGCACCTTCCCTGCCCAGA    |
| <i>SF-1 intron (ChIP)</i>     | IDT    | SYBR       |                      | GGACCACATGCCCTGCCACC    | CGCAGGCTGCACGGGAGTTT    |

**Supplemental table 2: antibodies used for immunoblotting and immunofluorescence**

| Target               | Source                      | Conjugated | Product ID  |
|----------------------|-----------------------------|------------|-------------|
| <i>DNMT1</i>         | Novus                       | No         | NM100-264   |
| <i>DNMT3A</i>        | Santa Cruz<br>Biotechnology | No         | 20703       |
| <i>DNMT3B</i>        | Imgenex                     | No         | IMG-184A    |
| <i>ACTB</i>          | Sigma                       | No         | A1978       |
| Anti-rabbit (Donkey) | Jackson<br>ImmunoResearch   | HRP        | 711-035-152 |
| Anti-mouse (Donkey)  | Cell Signaling              | HRP        | 7076        |
| IgG (Mouse)          | Sigma                       | No         | I8765       |
